# Supplementary material
Source: publisher site journal article supplement (https://www.dovepress.com/get_supplementary_file.php?f=447270.docx)
Supplement: Supplementary file 1 [file get_supplementary_file.php]

Supplementary Table 1. Characteristics of time spent and energy expenditure during each trimester

| **Exercise** | **Trimester** | **Preterm(*n*=285)** | |  | **Full-term(*n=*6216)** | | ***P*** |
| --- | --- | --- | --- | --- | --- | --- | --- |
| ***Mean (SD)*** | ***Median (IQR)*** |  | ***Mean (SD)*** | ***Median(IQR)*** |
| Time spent | Whole pregnancy | 5.12 (5.04) | 4.67 (8.17) |  | 5.62 (4.99) | 7.00 (8.17) | 0.045* |
| (h/week) | The 1st | 5.23 (5.40) | 3.5 (7.00) |  | 5.58 (5.70) | 7.00 (7.00) | 0.145 |
|  | The 2nd | 5.39 (5.56) | 7.00 (7.00) |  | 5.76 (5.66) | 7.00 (7.00) | 0.093 |
|  | The 3rd | 4.72 (5.02) | 3.5 (7.00) |  | 5.51 (4.88) | 7.00 (7.00) | 0.005* |
| Energy expenditure | Whole pregnancy | 12.85 (15.89) | 9.34 (17.50) |  | 14.04 (16.61) | 14.00 (17.50) | 0.058 |
| (Met.h/week) | The 1st | 13.00 (16.17) | 8.75 (14.00) |  | 13.81 (17.67) | 14.00 (14.00) | 0.204 |
|  | The 2nd | 14.06 (18.58) | 14.00 (14.00) |  | 14.64 (18.12) | 14.00 (14.44) | 0.121 |
|  | The 3rd | 11.49 (15.20) | 7.00 (14.00) |  | 13.57 (17.08) | 14.00 (14.00) | 0.007* |

Note: **P*<0.05; *SD*: standard deviation; *IQR*: interquartile range

Supplementary Table 2. Association between time spent on exercise per week during each trimester and PTB

| **Time spent** | **Preterm** | **Full-term** | **Preterm rates（%）** | **Unadjusted** | |  | **Adjusted** | |
| --- | --- | --- | --- | --- | --- | --- | --- | --- |
| ***n*** | ***n*** | ***OR*** | **95%*CI*** | ***OR*** | **95%*CI*** |
| The 1st trimester |  |  |  |  |  |  |  |  |
| None and low | 112 | 2094 | 5.08 | 1.00 |  |  | 1.00 |  |
| Moderate | 124 | 3059 | 3.90 | 0.76* | 0.58-0.99 |  | 0.77* | 0.59-1.00 |
| High | 49 | 1063 | 4.41 | 0.86 | 0.61-1.21 |  | 0.83 | 0.58-1.16 |
| The 2nd trimester |  |  |  |  |  |  |  |  |
| None and low | 111 | 2008 | 5.24 | 1.00 |  |  | 1.00 |  |
| Moderate | 125 | 3091 | 3.89 | 0.73* | 0.56-0.95 |  | 0.74* | 0.57-0.96 |
| High | 49 | 1117 | 4.20 | 0.79 | 0.56-1.11 |  | 0.77 | 0.54-1.08 |
| The 3rd trimester |  |  |  |  |  |  |  |  |
| None and low | 115 | 2030 | 5.36 | 1.00 |  |  | 1.00 |  |
| Moderate | 132 | 3167 | 4.00 | 0.74* | 0.57-0.95 |  | 0.74* | 0.56-0.96 |
| High | 38 | 1019 | 3.60 | 0.66* | 0.45-0.95 |  | 0.65* | 0.44-0.94 |
| Note: *OR* = odds ratio: Adjusted for maternal age, maternal occupation, parity, and family income; *CI* = confidence interval; * *P*<0.05. | | | | | | | | |

Supplementary Table 3. Association between energy expenditure per week during each trimester and PTB

| **Energy expenditure** | **Preterm** | **Full-term** | **Preterm rates（%）** | **Unadjusted** | |  | **Adjusted** | |
| --- | --- | --- | --- | --- | --- | --- | --- | --- |
| ***n*** | ***n*** | ***OR*** | **95%*CI*** | ***OR*** | **95%*CI*** |
| The 1st trimester |  |  |  |  |  |  |  |  |
| None and low | 143 | 2861 | 4.76 | 1.00 |  |  |  |  |
| Moderate | 116 | 2876 | 3.88 | 0.81 | 0.63-1.04 |  | 0.80 | 0.62-1.03 |
| High | 26 | 479 | 5.15 | 1.09 | 0.69-1.64 |  | 1.06 | 0.67-1.60 |
| The 2nd trimester |  |  |  |  |  |  |  |  |
| None and low | 138 | 2720 | 4.83 | 1.00 |  |  | 1.00 |  |
| Moderate | 117 | 2949 | 3.82 | 0.78 | 0.61-1.01 |  | 0.79 | 0.61-1.01 |
| High | 30 | 547 | 5.20 | 1.08 | 0.71-1.60 |  | 1.05 | 0.69-1.55 |
| The 3rd trimester |  |  |  |  |  |  |  |  |
| None and low | 155 | 2896 | 5.08 | 1.00 |  |  | 1.00 |  |
| Moderate | 111 | 2843 | 3.76 | 0.73* | 0.57-0.93 |  | 0.74* | 0.57-0.95 |
| High | 19 | 477 | 3.83 | 0.74 | 0.44-1.18 |  | 0.74 | 0.44-1.18 |
| Note: *OR* = odds ratio: Adjusted for maternal age, maternal occupation, parity, and family income; *CI* = confidence interval; * *P*<0.05. | | | | | | | | |

Supplementary Table 4. Analysis of the mediating effect of pregnancy complications on the relationship between PTB and exercise during pregnancy

| **Mediation analysis** | | **Coefficients** | ***P*** |
| --- | --- | --- | --- |
| *Y=cX+e1* | *(c)* | -0.313 | 0.014* |
| *M=aX+e2* | *(a)* | -0.243 | 0.048* |
| *Y=c’ X+bM+e3* | *(c’)* | -0.295 | 0.021* |
|  | *(b)* | 1.418 | <0.001* |
| Mediated effect | | -0.345 | - |
| Estimated percent mediated | | 52.40% | - |

Note: **P* < 0.05.
